# Supplementary material for: Coronatine Modulated the Generation of Reactive Oxygen Species for Regulating the Water Loss Rate in the Detaching Maize Seedlings
Source: MDPI journal article supplement (doi:10.3390/agriculture11070685), 2021-07-20
Supplement: s1 [file s1]

Table S1: List of primers used in this study.

| Gene Name          | Gene ID       | Primer sequence          |
|--------------------|---------------|--------------------------|
| ZmCAT1_F           | GRMZM2G088212 | CCAAGGGTTTCTTTGAGGT      |
| ZmCAT1_R           | GRMZM2G088212 | AGGGTCGAAGGAACGATAT      |
| ZmcAPX_F           | GRMZM2G140667 | CGACAAGGCCAAGCGTAA       |
| ZmcAPX_R           | GRMZM2G140667 | GCTCCCTCAAATCCAGACC      |
| ZmDREB2A_F         | GRMZM2G006745 | CCCAACCGCGGAGGATGCAG     |
| ZmDREB2A_R         | GRMZM2G006745 | GCCTGGGCAGAGGTCGATGC     |
| ZmRBOHA_F          | GRMZM2G426953 | ATGACATTCTTCTGCTTATTGGC  |
| ZmRBOHA_R          | GRMZM2G426953 | ATGCTTCCCACCTCTTCGTT     |
| ZmRBOHB_F          | GRMZM2G138152 | ACCCTTTGAATGGCATCCG      |
| ZmRBOHB_R          | GRMZM2G138152 | AAGGAGTTGCACCAATCCCTAAT  |
| ZmRBOHC_F          | GRMZM2G043435 | GAATACGAAAGCTGCACGGGCATT |
| ZmRBOHC_R          | GRMZM2G043435 | CCAAAGTATTTGCGCAGTGGAGCA |
| $\beta$ -tubulin_F | GRMZM2G090115 | GTACCGCGCTCTCACCGTGC     |
| $\beta$ -tubulin_R | GRMZM2G090115 | ACGGAACATAGCAGATG CCGTGA |
